# Supplementary material for: Managing Sustainable Working Hours within Participatory Working Time Scheduling for Nurses and Assistant Nurses: A Qualitative Interview Study with Managers and Staffing Assistants
Source: J Nurs Manag. 2023 Dec 9;2023:8096034. doi: 10.1155/2023/8096034 (PMC11918713; doi:10.1155/2023/8096034)
Supplement: Supplementary Materials — The full interview guide including all questions asked to managers and staffing assistants in the interviews is provided in Appendix 1. This study adhered to the Consolidated criteria for reporting qualitative research (COREQ) [48]. The COREQ checklist is provided in Appendix 2. [file 8096034.f1.zip]

Archive with 2 entries (2 files):
- Appendix 1 Interview guide.docx
- Appendix 2 COREQ Checklist.pdf
